# Supplementary material
Source: PubMed Central journal article supplement (PMC8664721)
Supplement: mmc1.pdf [file mmc1.pdf]

## Supplementary Appendix

**Supplementary Table 1. Level of DORSCON alert and impact on healthcare setting**

| DORSCON level    | Nature of disease                                                                                                                                                              | Changes in the healthcare settings                                                                                                                                                                                                                                                                                                                                                                                                                     |
|------------------|--------------------------------------------------------------------------------------------------------------------------------------------------------------------------------|--------------------------------------------------------------------------------------------------------------------------------------------------------------------------------------------------------------------------------------------------------------------------------------------------------------------------------------------------------------------------------------------------------------------------------------------------------|
| Green (baseline) | Disease is mild <b>or</b> disease is severe but do not spread easily from person to person                                                                                     | <ul style="list-style-type: none"> <li>○ PPE use based on specific risk settings</li> <li>○ Outpatient clinic running capacity – 100%</li> <li>○ OT capacity – 100% (as per normal)</li> <li>○ Annual leave and travel prohibitions – no restrictions (as per normal)</li> <li>○ Staff deployment – none deployed</li> </ul>                                                                                                                           |
| Yellow           | Disease is severe and spread easily from person to person but is occurring outside Singapore <b>or</b> disease is spreading in Singapore but is typically mild or is contained | <ul style="list-style-type: none"> <li>○ PPE use required in all triage settings</li> <li>○ Outpatient clinic running capacity – 100%</li> <li>○ OT capacity – 100% (as per normal)</li> <li>○ Annual leave and travel prohibitions – travel to affected countries prohibited</li> <li>○ Staff deployment – none deployed</li> </ul>                                                                                                                   |
| Orange           | Disease is severe <b>and</b> spreads easily from person to person, but has not spread widely in Singapore and is being contained                                               | <ul style="list-style-type: none"> <li>○ PPE use required in all patient care setting</li> <li>○ Outpatient clinic running capacity – 70%</li> <li>○ OT capacity – priority to only urgent or cancer-related surgeries</li> <li>○ Annual leave and travel prohibitions – travel to affected countries prohibited and all overseas travel discouraged</li> <li>○ Staff deployment – Healthcare staff deployed for outbreak related processes</li> </ul> |
| Red              | Disease is severe <b>and</b> spreading widely                                                                                                                                  | <ul style="list-style-type: none"> <li>○ PPE use required in all patient care setting</li> <li>○ Outpatient clinic running capacity – 50%</li> <li>○ OT capacity – only urgent or cancer-related surgeries allowed</li> <li>○ Annual leave and travel prohibition – All leave cancelled</li> <li>○ Staff deployment – Sustained help deployed for outbreak related processes</li> </ul>                                                                |

Abbreviations: DORSCON, Disease Outbreak Response Condition; OT, operating theatre; PPE, personal protective equipment
